# Supplementary material for: The monthly trends of malaria cases in children under 5 years of age in Guinea: comparative analysis between a seasonal malaria chemoprevention (SMC) and a non-SMC health district
Source: PubMed Central journal article supplement — Malar J. 2024 Aug 8;23:237. doi: 10.1186/s12936-024-05060-4 (PMC11312227; doi:10.1186/s12936-024-05060-4), 2024-08-08

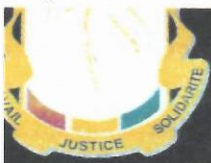

# PROGRAMME NATIONAL DE LUTTE CONTRE LE PALUDISME

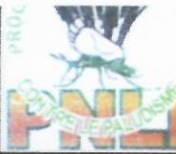

N° 025 /PNLP/024

Conakry, le 12/03/2024

## *Le Coordonnateur*

À Monsieur le Coordonnateur de la Cellule de Recherche  
en Santé de la Reproduction en Guinée.

**Objet :** Réponse au courrier N° 025/CERREGUI/2024.

Monsieur le Coordonnateur,

Pour faire suite à votre courrier référencé N° 025 / CERREGUI / 2024 du 19 février 2024, relatif à l'autorisation pour l'utilisation des données sanitaires de routine du SNIS sur le Paludisme.

Nous sommes heureux de vous autoriser à utiliser ces données. Le PNLP sollicite de prendre part à l'élaboration de cet article pour une meilleure capitalisation des résultats.

Prof. Alioune CAMARA

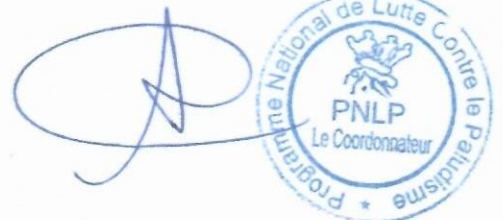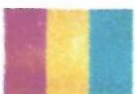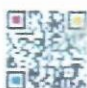

Supplement: 12936_2024_5060_MOESM3_ESM.pdf [file 12936_2024_5060_MOESM3_ESM.pdf]
